# Supplementary material
Source: PubMed Central journal article supplement (PMC5913978)
Supplement: AAC.01751-17_zac004187023s1.pdf [file AAC.01751-17_zac004187023s1.pdf]

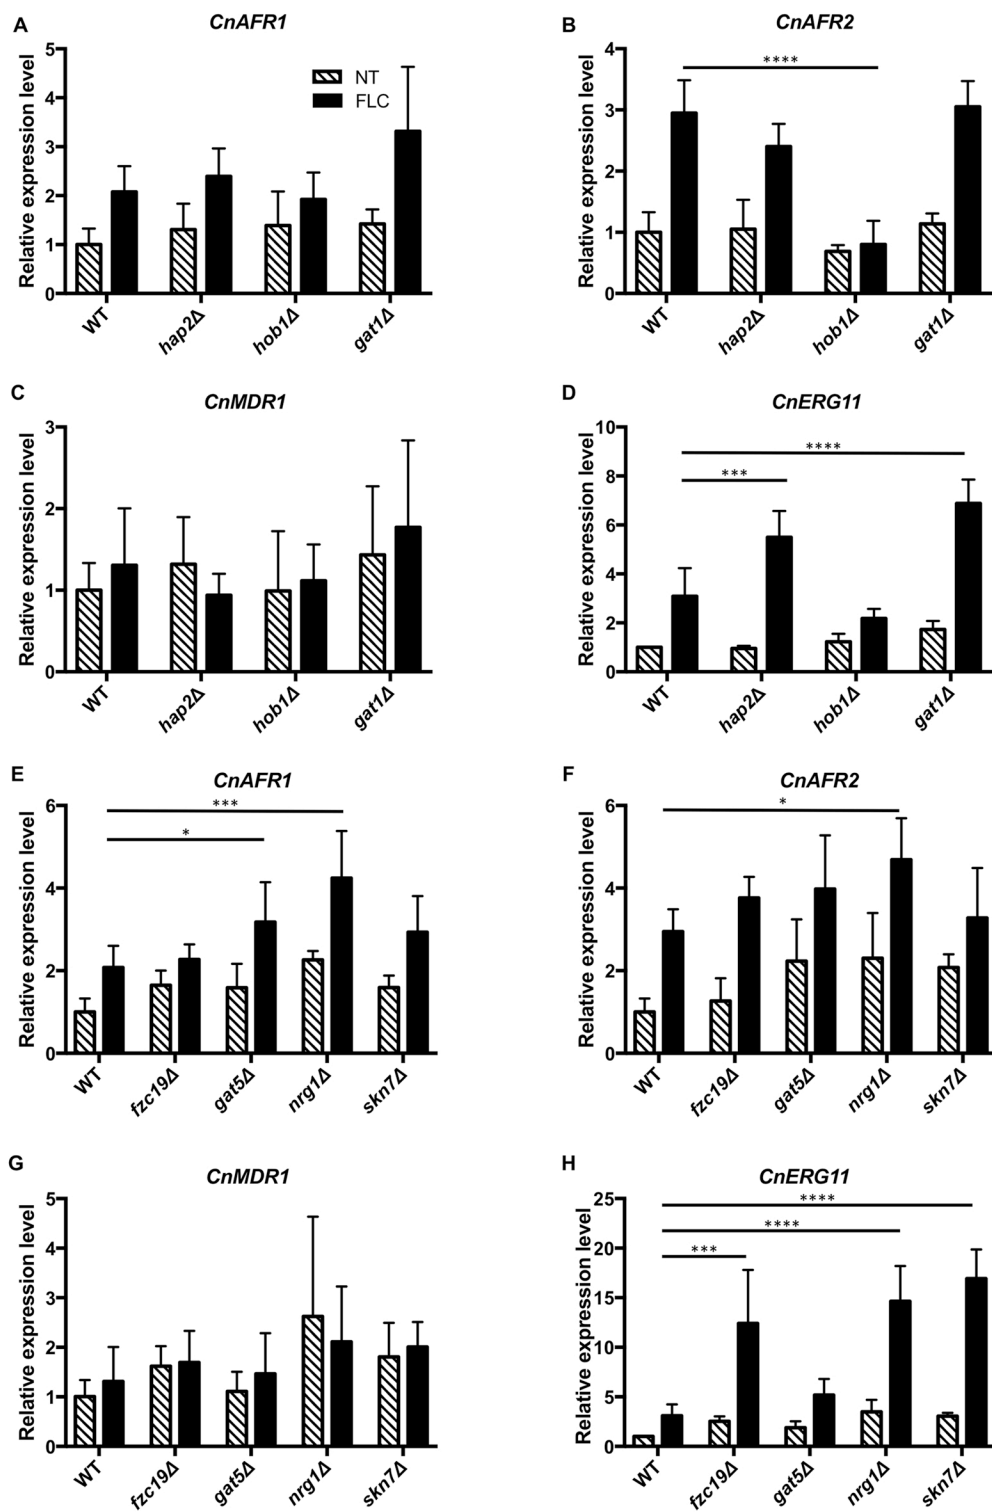

**Fig. S1.** The expression levels of *AFR1*, *AFR2*, *MDR1* and *ERG11* in the FLC resistance mutants (A-D) and mutants with increased frequency of FLC heteroresistance (E-H). The exponential growth phase cells of transcription factor mutant strains were either untreated (NT) or treated (FLC) with 32g/ml FLC for 2h. RNA was isolated and the expression levels of each gene were determined by RT-qPCR. The expression levels of each gene were normalized with that of actin gene and compared to the wild type without FLC treatment. Values represent the means  $\pm$  standard deviation of three biological replicates. \* represents  $p < 0.0476$ ; \*\*\* represents  $p < 0.0006$ ; \*\*\*\* represents  $p < 0.0001$  (uncorrected Fisher's LSD)

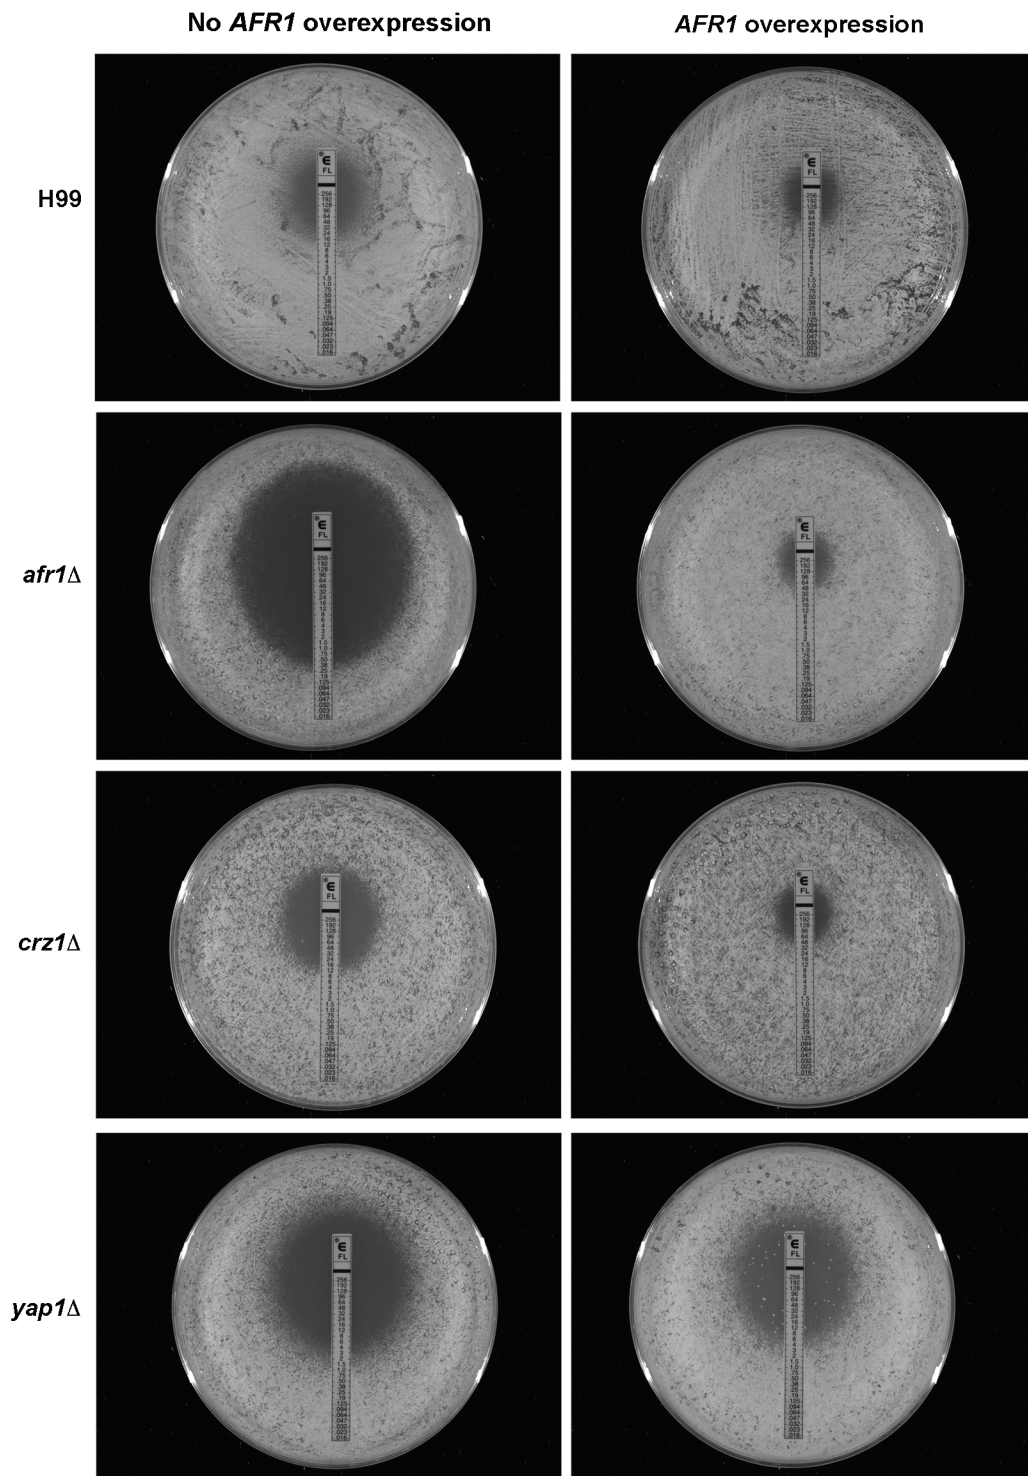

**Fig. S2.** Overexpression of *AFR1* results in a decrease of susceptibility to FLC. *AFR1* was placed under the control of *GPD1* promoter and transformed into indicated strains. E-test was used to measure the FLC susceptibility and photographs were taken after 3 days of incubation.

**Table S1.** List of strains used in this study.

| Strain                                                             | Genotype                                                                                      | Parent | Reference  |
|--------------------------------------------------------------------|-----------------------------------------------------------------------------------------------|--------|------------|
| H99 ( <i>C. neoformans</i> )                                       | MAT $\alpha$ serotype A                                                                       |        | (1)        |
| <i>afr1</i> $\Delta$                                               | MAT $\alpha$ <i>afr1</i> $\Delta$ ::NEO                                                       | H99    | (2)        |
| <i>afr2</i> $\Delta$                                               | MAT $\alpha$ <i>afr2</i> $\Delta$ ::NEO                                                       | H99    | This study |
| <i>mdr1</i> $\Delta$                                               | MAT $\alpha$ <i>mdr1</i> $\Delta$ ::NEO                                                       | H99    | This study |
| <i>afr1</i> $\Delta$ / <i>afr2</i> $\Delta$                        | MAT $\alpha$ <i>afr1</i> $\Delta$ ::NEO <i>afr2</i> $\Delta$ ::HYG                            | H99    | This study |
| <i>afr1</i> $\Delta$ / <i>mdr1</i> $\Delta$                        | MAT $\alpha$ <i>afr1</i> $\Delta$ ::NEO <i>mdr1</i> $\Delta$ ::NAT                            | H99    | This study |
| <i>afr2</i> $\Delta$ / <i>mdr1</i> $\Delta$                        | MAT $\alpha$ <i>afr2</i> $\Delta$ ::NEO <i>mdr1</i> $\Delta$ ::NAT                            | H99    | This study |
| <i>afr1</i> $\Delta$ / <i>afr2</i> $\Delta$ / <i>mdr1</i> $\Delta$ | MAT $\alpha$ <i>afr1</i> $\Delta$ ::NEO <i>afr2</i> $\Delta$ ::HYG <i>mdr1</i> $\Delta$ ::NAT | H99    | This study |
| YSB815                                                             | MAT $\alpha$ <i>yap1</i> $\Delta$ ::NAT                                                       | H99    | Y. Bahn    |
| YSB1416                                                            | MAT $\alpha$ <i>yap2</i> $\Delta$ ::NAT                                                       | H99    | Y. Bahn    |
| YSB1099                                                            | MAT $\alpha$ <i>bzp3</i> $\Delta$ ::NAT                                                       | H99    | Y. Bahn    |
| YSB1249                                                            | MAT $\alpha$ <i>pip2</i> $\Delta$ ::NAT                                                       | H99    | Y. Bahn    |
| YSB1263                                                            | MAT $\alpha$ <i>crz1</i> $\Delta$ ::NAT                                                       | H99    | Y. Bahn    |
| YSB2493                                                            | MAT $\alpha$ <i>sre1</i> $\Delta$ ::NAT                                                       | H99    | Y. Bahn    |
| YSB2622                                                            | MAT $\alpha$ <i>zfc2</i> $\Delta$ ::NAT                                                       | H99    | Y. Bahn    |
| YSB2702                                                            | MAT $\alpha$ <i>bzp2</i> $\Delta$ ::NAT                                                       | H99    | Y. Bahn    |
| YSB1104                                                            | MAT $\alpha$ <i>hap2</i> $\Delta$ ::NAT                                                       | H99    | Y. Bahn    |
| YSB2308                                                            | MAT $\alpha$ <i>hob1</i> $\Delta$ ::NAT                                                       | H99    | Y. Bahn    |
| YSB2972                                                            | MAT $\alpha$ <i>gat1</i> $\Delta$ ::NAT                                                       | H99    | Y. Bahn    |
| YSB3096                                                            | MAT $\alpha$ <i>nrg1</i> $\Delta$ ::NAT                                                       | H99    | Y. Bahn    |
| R265 ( <i>C. gattii</i> )                                          | MAT $\alpha$ VGII serotype B                                                                  |        | (3)        |
| <i>afr1</i> $\Delta$                                               | MAT $\alpha$ <i>afr1</i> $\Delta$ ::NEO                                                       | R265   | This study |
| <i>afr2</i> $\Delta$                                               | MAT $\alpha$ <i>afr2</i> $\Delta$ ::NEO                                                       | R265   | This study |
| <i>mdr1</i> $\Delta$                                               | MAT $\alpha$ <i>mdr1</i> $\Delta$ ::NEO                                                       | R265   | This study |
| <i>afr1</i> $\Delta$ / <i>afr2</i> $\Delta$                        | MAT $\alpha$ <i>afr1</i> $\Delta$ ::NEO <i>afr2</i> $\Delta$ ::NAT                            | R265   | This study |
| <i>afr1</i> $\Delta$ / <i>mdr1</i> $\Delta$                        | MAT $\alpha$ <i>afr1</i> $\Delta$ ::NEO <i>mdr1</i> $\Delta$ ::NAT                            | R265   | This study |
| <i>afr2</i> $\Delta$ / <i>mdr1</i> $\Delta$                        | MAT $\alpha$ <i>afr2</i> $\Delta$ ::NEO <i>mdr1</i> $\Delta$ ::NAT                            | R265   | This study |
| <i>afr1</i> $\Delta$ / <i>afr2</i> $\Delta$ / <i>mdr1</i> $\Delta$ | MAT $\alpha$ <i>afr1</i> $\Delta$ ::NEO <i>afr2</i> $\Delta$ ::NAT <i>mdr1</i> $\Delta$ ::HYG | R265   | This study |

1. **Perfect JR, Ketabchi N, Cox GM, Ingram CW, Beiser CL.** 1993. Karyotyping of *Cryptococcus neoformans* as an epidemiological tool. J Clin Microbiol **31**:3305-3309.
2. **Sionov E, Lee H, Chang YC, Kwon-Chung KJ.** 2010. *Cryptococcus neoformans* overcomes stress of azole drugs by formation of disomy in specific multiple chromosomes. PLoS Pathog **6**:e1000848.
3. **Kidd SE, Hagen F, Tschärke RL, Huynh M, Bartlett KH, Fyfe M, Macdougall L, Boekhout T, Kwon-Chung KJ, Meyer W.** 2004. A rare genotype of *Cryptococcus gattii* caused the cryptococcosis outbreak on Vancouver Island (British Columbia, Canada). Proc Natl Acad Sci U S A **101**:17258-17263.

**Table S2.** Primers used in this study.

| Primer name    | Sequence (5' to 3')                           | Purpose          |
|----------------|-----------------------------------------------|------------------|
| CNAG_AFR2_A    | CAAATTCGAGGAGCTTGGAG                          | PCR for deletion |
| CNAG_AFR2_B    | GCTAGTTTCTACATCTCTTCCGTGCGGTCGTAAGTACCCAAACC  | PCR for deletion |
| CNAG_AFR2_C    | CGCCGCTCTCCAGCTCACATCCTCGTCTCGTTCCAGCGAAAGAC  | PCR for deletion |
| CNAG_AFR2_D    | GAAAAGGGCCTATGCAATGA                          | PCR for deletion |
| CNAG_AFR2_E    | TCTTGTCGTCATTCCCCTTC                          | PCR for deletion |
| CNAG_AFR2_F    | TAGGTAAAGGGCCGAAAGGT                          | PCR for deletion |
| CNAG_MDR1_A    | AAATGCGTAGGTGGCAAAAA                          | PCR for deletion |
| CNAG_MDR1_B    | GCTAGTTTCTACATCTCTTCCGTGGCAGTGAGTCCTGGAGAAGC  | PCR for deletion |
| CNAG_MDR1_C    | CGCCGCTCTCCAGCTCACATCCTCCGCGAGGCAGGACTACTATC  | PCR for deletion |
| CNAG_MDR1_D    | TCGCAAAGTAGCAGTGAACAA                         | PCR for deletion |
| CNAG_MDR1_E    | GCTCTGTTTGATGGATTTTGC                         | PCR for deletion |
| CNAG_MDR1_F    | AACGAGTGCCACACTTAAAAAG                        | PCR for deletion |
| CNBG_AFR1_A    | GCGACGACAGCAATAAATGA                          | PCR for deletion |
| CNBG_AFR1_B    | GCTAGTTTCTACATCTCTTCCGTGCCTGACGGATTCTGAGTGGT  | PCR for deletion |
| CNBG_AFR1_C    | CGCCGCTCTCCAGCTCACATCCTCAACCAGGTGGAGAGATTTTCG | PCR for deletion |
| CNBG_AFR1_D    | CAACGTCATTGCTTTGATGG                          | PCR for deletion |
| CNBG_AFR1_E    | GTCTTGGTCGGTTGGTGACT                          | PCR for deletion |
| CNBG_AFR1_F    | GTTGCTTCGGGTGATCAAAT                          | PCR for deletion |
| CNBG_AFR2_A    | GATCCCCCTCAGAGCTTTC                           | PCR for deletion |
| CNBG_AFR2_B    | GCTAGTTTCTACATCTCTTCCGTGACGGTTTTCTTCCGTTTGAG  | PCR for deletion |
| CNBG_AFR2_C    | CGCCGCTCTCCAGCTCACATCCTCCGGAGGACGTACAGGAGAAG  | PCR for deletion |
| CNBG_AFR2_D    | GGATGACGATAAACGGCAAT                          | PCR for deletion |
| CNBG_AFR2_E    | GCCTATGCAGACGACTGTGA                          | PCR for deletion |
| CNBG_AFR2_F    | TTCGATTGCCTCAAGATTCC                          | PCR for deletion |
| CNBG_MDR1_A    | ATAATGCAGCGGTGGAAAAA                          | PCR for deletion |
| CNBG_MDR1_B    | GCTAGTTTCTACATCTCTTCCGTGAGAATCATGGGCAAGAGCAT  | PCR for deletion |
| CNBG_MDR1_C    | CGCCGCTCTCCAGCTCACATCCTCGAGCATGGAACACACCAAGA  | PCR for deletion |
| CNBG_MDR1_D    | TGCAGATCAAAGCAACAGGT                          | PCR for deletion |
| CNBG_MDR1_E    | CGAAGCAAGGAAAGATGGAG                          | PCR for deletion |
| CNBG_MDR1_F    | TTCCGATCGATTACCGATGT                          | PCR for deletion |
| CNAG_AFR1_For  | ACTGTCTGCTCGTGGGATAACTC                       | RT-PCR           |
| CNAG_AFR1_Rev  | GAAGTCGAAGAGATTTGGCGTAGT                      | RT-PCR           |
| CNAG_AFR2_For  | GGCCATTTACAGACACTCA                           | RT-PCR           |
| CNAG_AFR2_Rev  | CTTCGCGAGCACGGTGTT                            | RT-PCR           |
| CNAG_MDR1_For  | TCCCGGATGCGTCCAA                              | RT-PCR           |
| CNAG_MDR1_Rev  | CATTGTCGATGCTTCGGAAGA                         | RT-PCR           |
| CNAG_ERG11_For | TGGCAAGACGCCAAAGTCT                           | RT-PCR           |
| CNAG_ERG11_Rev | GGCGGCAAATCCCTTTTC                            | RT-PCR           |
| CNBG_AFR1_For  | GCCACTCAGCATGACGAACA                          | RT-PCR           |
| CNBG_AFR1_Rev  | GACCGACTTATCGCCCTCTTC                         | RT-PCR           |
| CNBG_AFR2_For  | CTGATTTTCTGCGGTGTATTGG                        | RT-PCR           |
| CNBG_AFR2_Rev  | AACGGCGAAACACGATACATAA                        | RT-PCR           |
| CNBG_MDR1_For  | CAAGCCGAAACGTCTTCA                            | RT-PCR           |
| CNBG_MDR1_Rev  | TGGAAGCGGCCGATGA                              | RT-PCR           |
| CNAG_Actin_For | CTTGCTCTTTGTCTACCTTCCA                        | RT-PCR           |
| CNAG_Actin_Rev | GGACGATTGAGGGACCAGACT                         | RT-PCR           |
| CNBG_Actin_For | CGAGGGCGACCAACAATAGA                          | RT-PCR           |
| CNBG_Actin_Rev | ATGTGCAAGGCTGGTTTCG                           | RT-PCR           |

**Table S3.** Primers used for qPCR assays.

| Probe name | Chromosome location | Locus name | Primer forward                                                                 | Probe                          |
|------------|---------------------|------------|--------------------------------------------------------------------------------|--------------------------------|
| chr1A      | Chr1                | CNAG_00040 | forward 5'-TGGCAAGACGCCAAAGTCT-3'<br>reverse 5'-GGCGGCAAATCCCTTTTC-3'          | AACCCTGCCCCG<br>ATGGCACGA      |
| chr3A      | Chr3                | CNAG_02959 | forward 5'-GAAGATGGCGAGCCTGACA-3'<br>reverse 5'-CACTTCGAGCCTTCTTCTCATG-3'      | CACCCAGGAGG<br>AGCTCGCCGA      |
| chr5B      | Chr5                | CNAG_00976 | forward 5'-CGGCTTTCTTTGTGTAAGTCTATCC-3'<br>reverse 5'-CATACTGCATCGCCAAGATCA-3' | TGCTTTTCGCAC<br>TCCA ACTGTTCCG |
